# Supplementary material for: A portable, disposable, and low-cost optode for sulphide and thiol detection
Source: Royal Society of Chemistry journal article supplement (doi:10.1039/c9ay01538h), 2019-01-01
Supplement: c9ay01538h1.pdf [file c9ay01538h1.pdf]

## Electronic Supplementary Information

### Portable, disposable, and low-cost optodes for sulphide and thiols detection

Giancarla Alberti\*<sup>a</sup>, Valeria M. Nurchi<sup>b</sup>, Lisa R. Magnaghi<sup>a</sup>, Raffaella Biesuz<sup>a</sup>

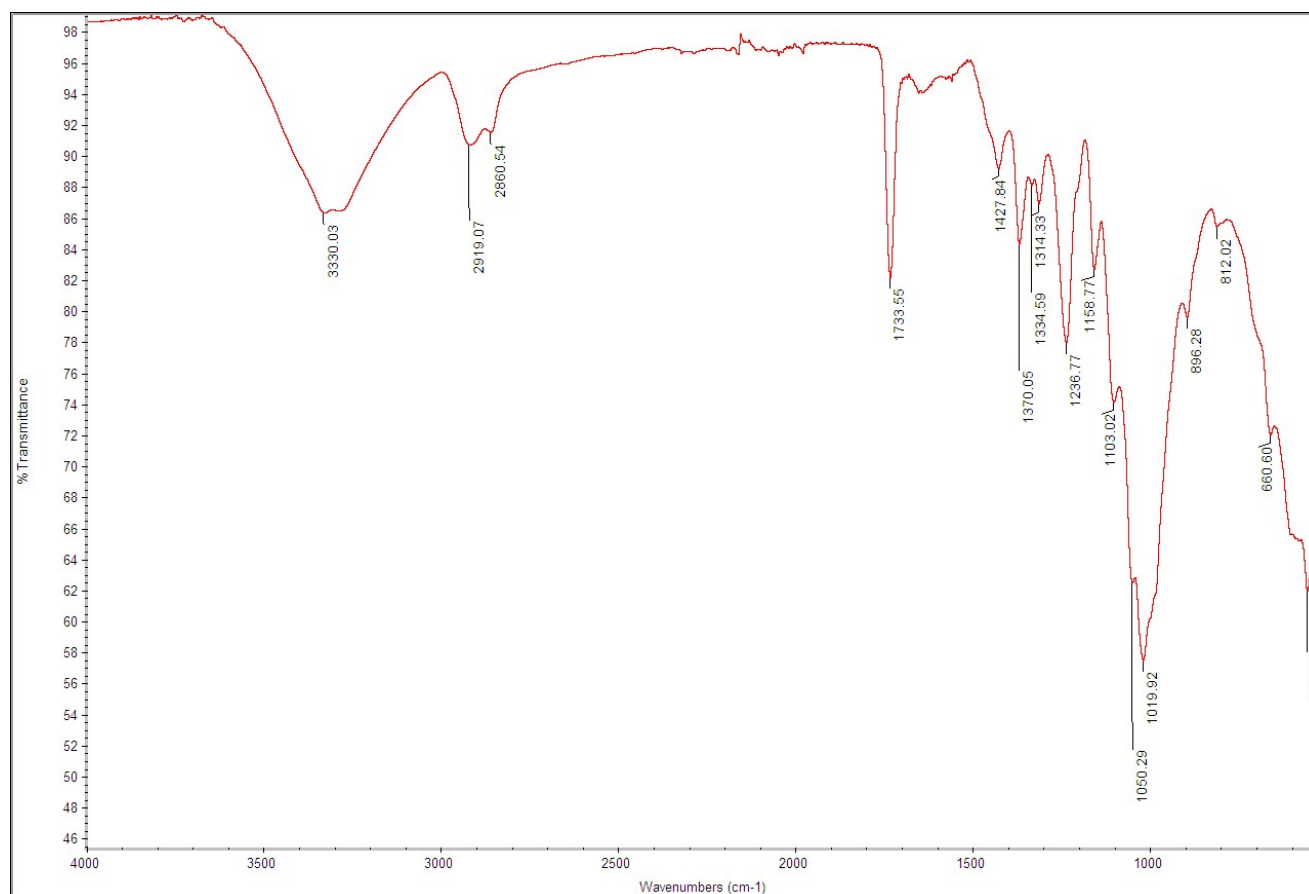

Figure s1 – ATR-IR spectrum of CC.

| Element | App Conc. | Intensity Corm. | Weight % | Weight % Sigma | Atomic % |
|---------|-----------|-----------------|----------|----------------|----------|
| C K     | 41.76     | 0.9550          | 50.55    | 0.37           | 58.20    |
| O K     | 22.73     | 0.5549          | 47.33    | 0.37           | 40.92    |
| Na K    | 0.15      | 0.7573          | 0.23     | 0.04           | 0.14     |
| Cl K    | 1.35      | 0.8254          | 1.89     | 0.05           | 0.74     |
| Totals  |           |                 | 100.00   |                |          |

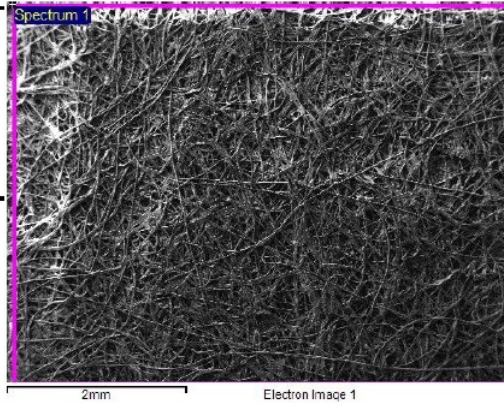

| Element | App Conc. | Intensity Corm. | Weight % | Weight % Sigma | Atomic % |
|---------|-----------|-----------------|----------|----------------|----------|
| C K     | 64.09     | 0.9990          | 50.06    | 0.30           | 57.60    |
| O K     | 34.97     | 0.5651          | 48.27    | 0.30           | 41.70    |
| Na K    | 0.20      | 0.7525          | 0.20     | 0.03           | 0.12     |
| Cl K    | 1.55      | 0.8244          | 1.47     | 0.03           | 0.57     |
| Totals  |           |                 | 100.00   |                |          |

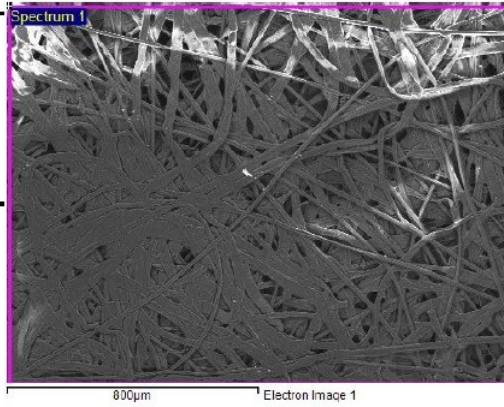

| Element | App Conc. | Intensity Corm. | Weight % | Weight % Sigma | Atomic % |
|---------|-----------|-----------------|----------|----------------|----------|
| C K     | 54.22     | 0.9892          | 49.47    | 0.32           | 57.03    |
| O K     | 30.90     | 0.5714          | 48.80    | 0.32           | 42.24    |
| Na K    | 0.19      | 0.7503          | 0.23     | 0.04           | 0.14     |
| Cl K    | 1.38      | 0.8242          | 1.51     | 0.04           | 0.59     |
| Totals  |           |                 | 100.00   |                |          |

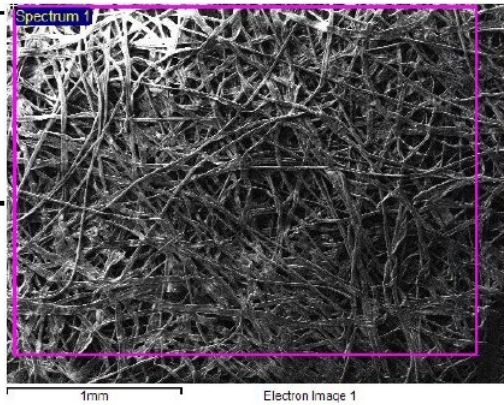

| Element | App Conc. | Intensity Corm. | Weight % | Weight % Sigma | Atomic % |
|---------|-----------|-----------------|----------|----------------|----------|
| C K     | 58.62     | 1.0064          | 49.66    | 0.33           | 57.19    |
| O K     | 32.62     | 0.5707          | 48.72    | 0.33           | 42.12    |
| Na K    | 0.21      | 0.7506          | 0.24     | 0.04           | 0.15     |
| Cl K    | 1.33      | 0.8241          | 1.37     | 0.04           | 0.54     |
| Totals  |           |                 | 100.00   |                |          |

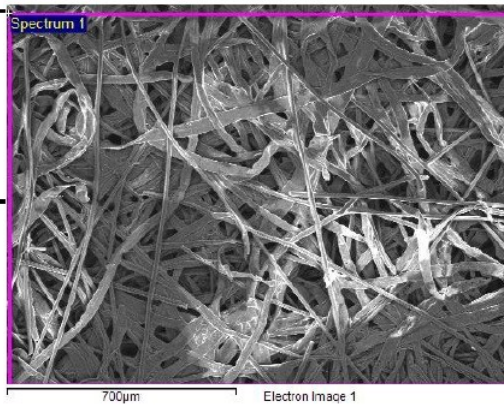

**Figure s2** – SEM images with different magnification and the corresponding EDX analysis.

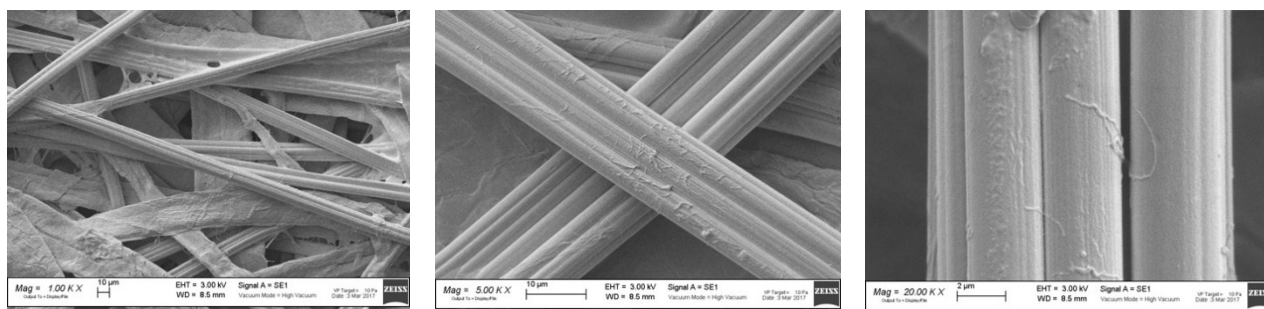

**Figure s3** - Electronic microscope imagines of the bare Colour Catcher® at different magnification order.

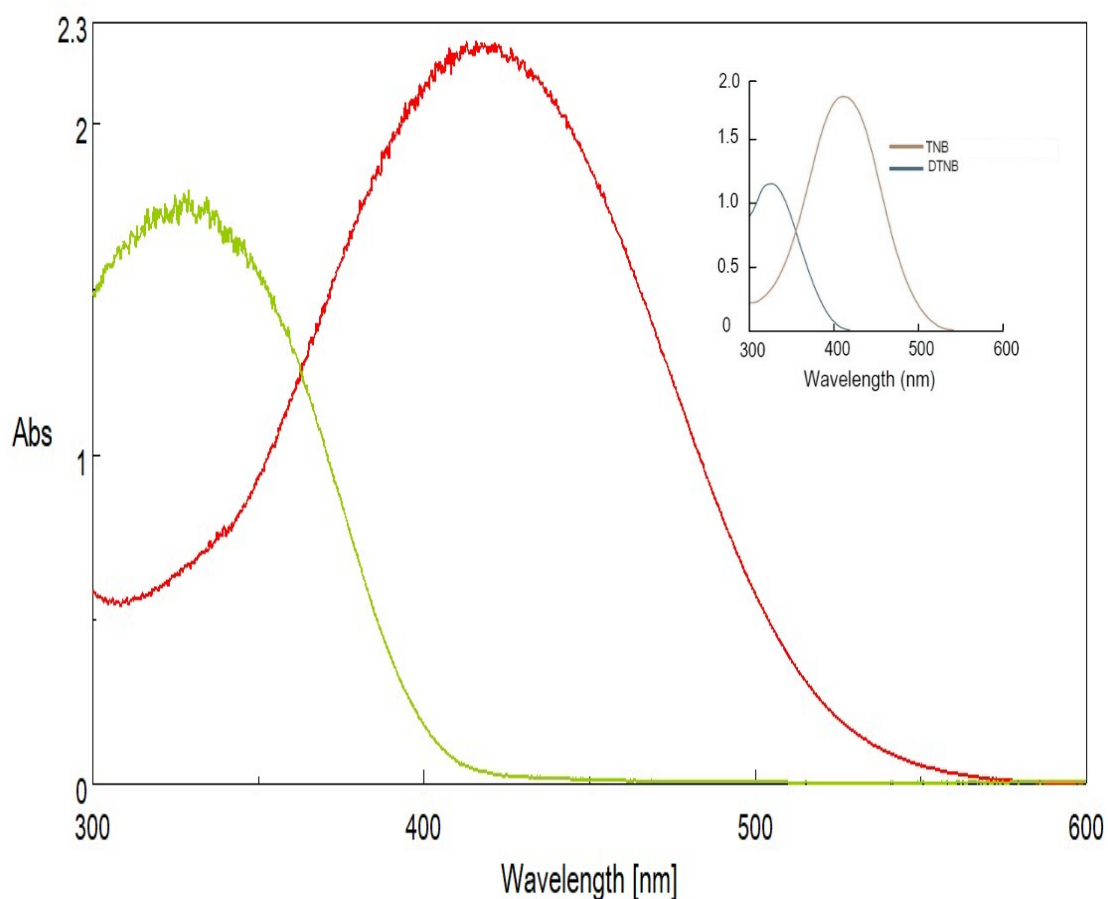

**Figure s4** – UV-vis spectra of the ELL-CC (DTNB fixed on the CC, green line) and of the product TNB-CC (red line) obtained after reaction with sulphides or thiols. The spectra in the box are the same obtained in solution.
